# Supplementary material
Source: PubMed Central journal article supplement (PMC3463347)

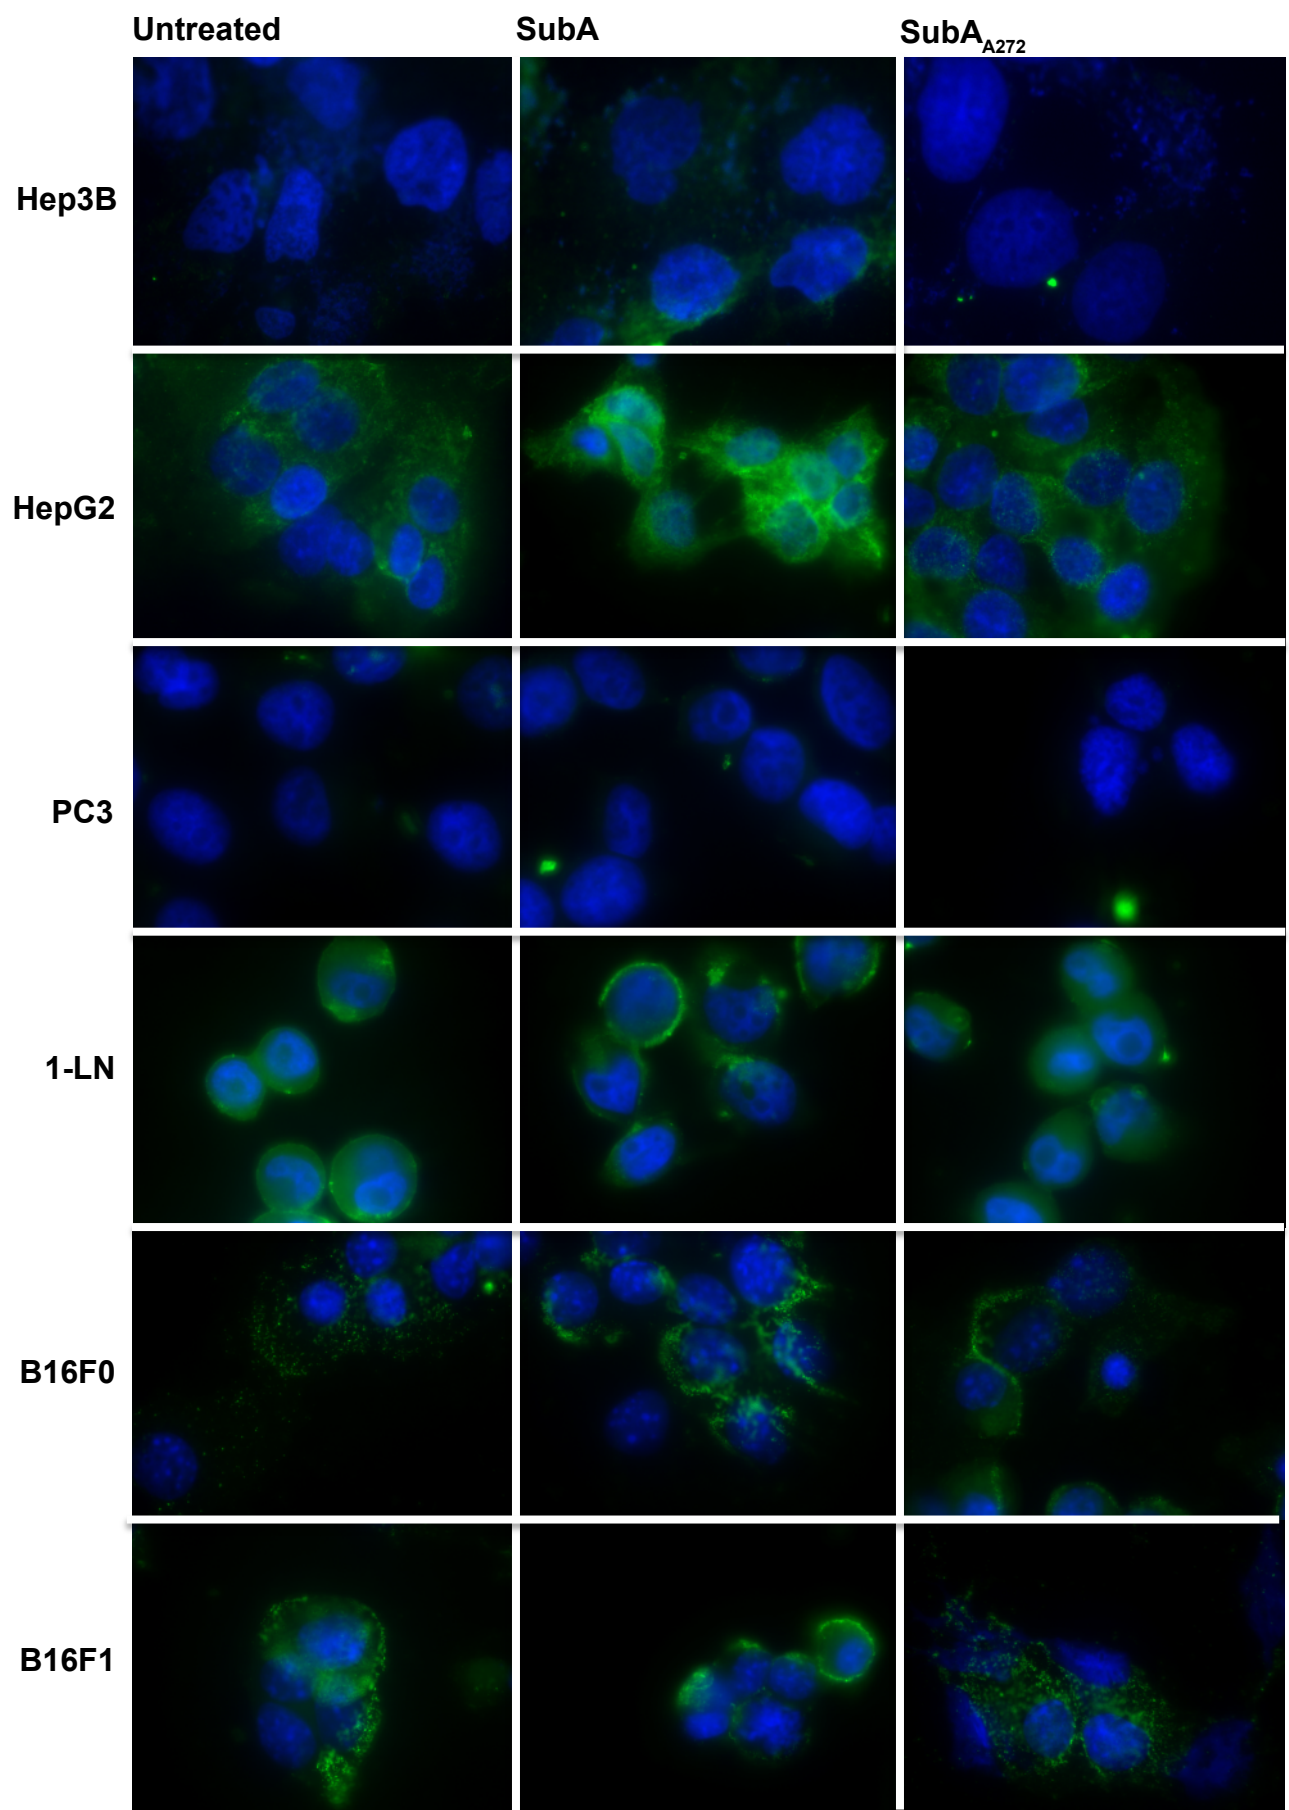

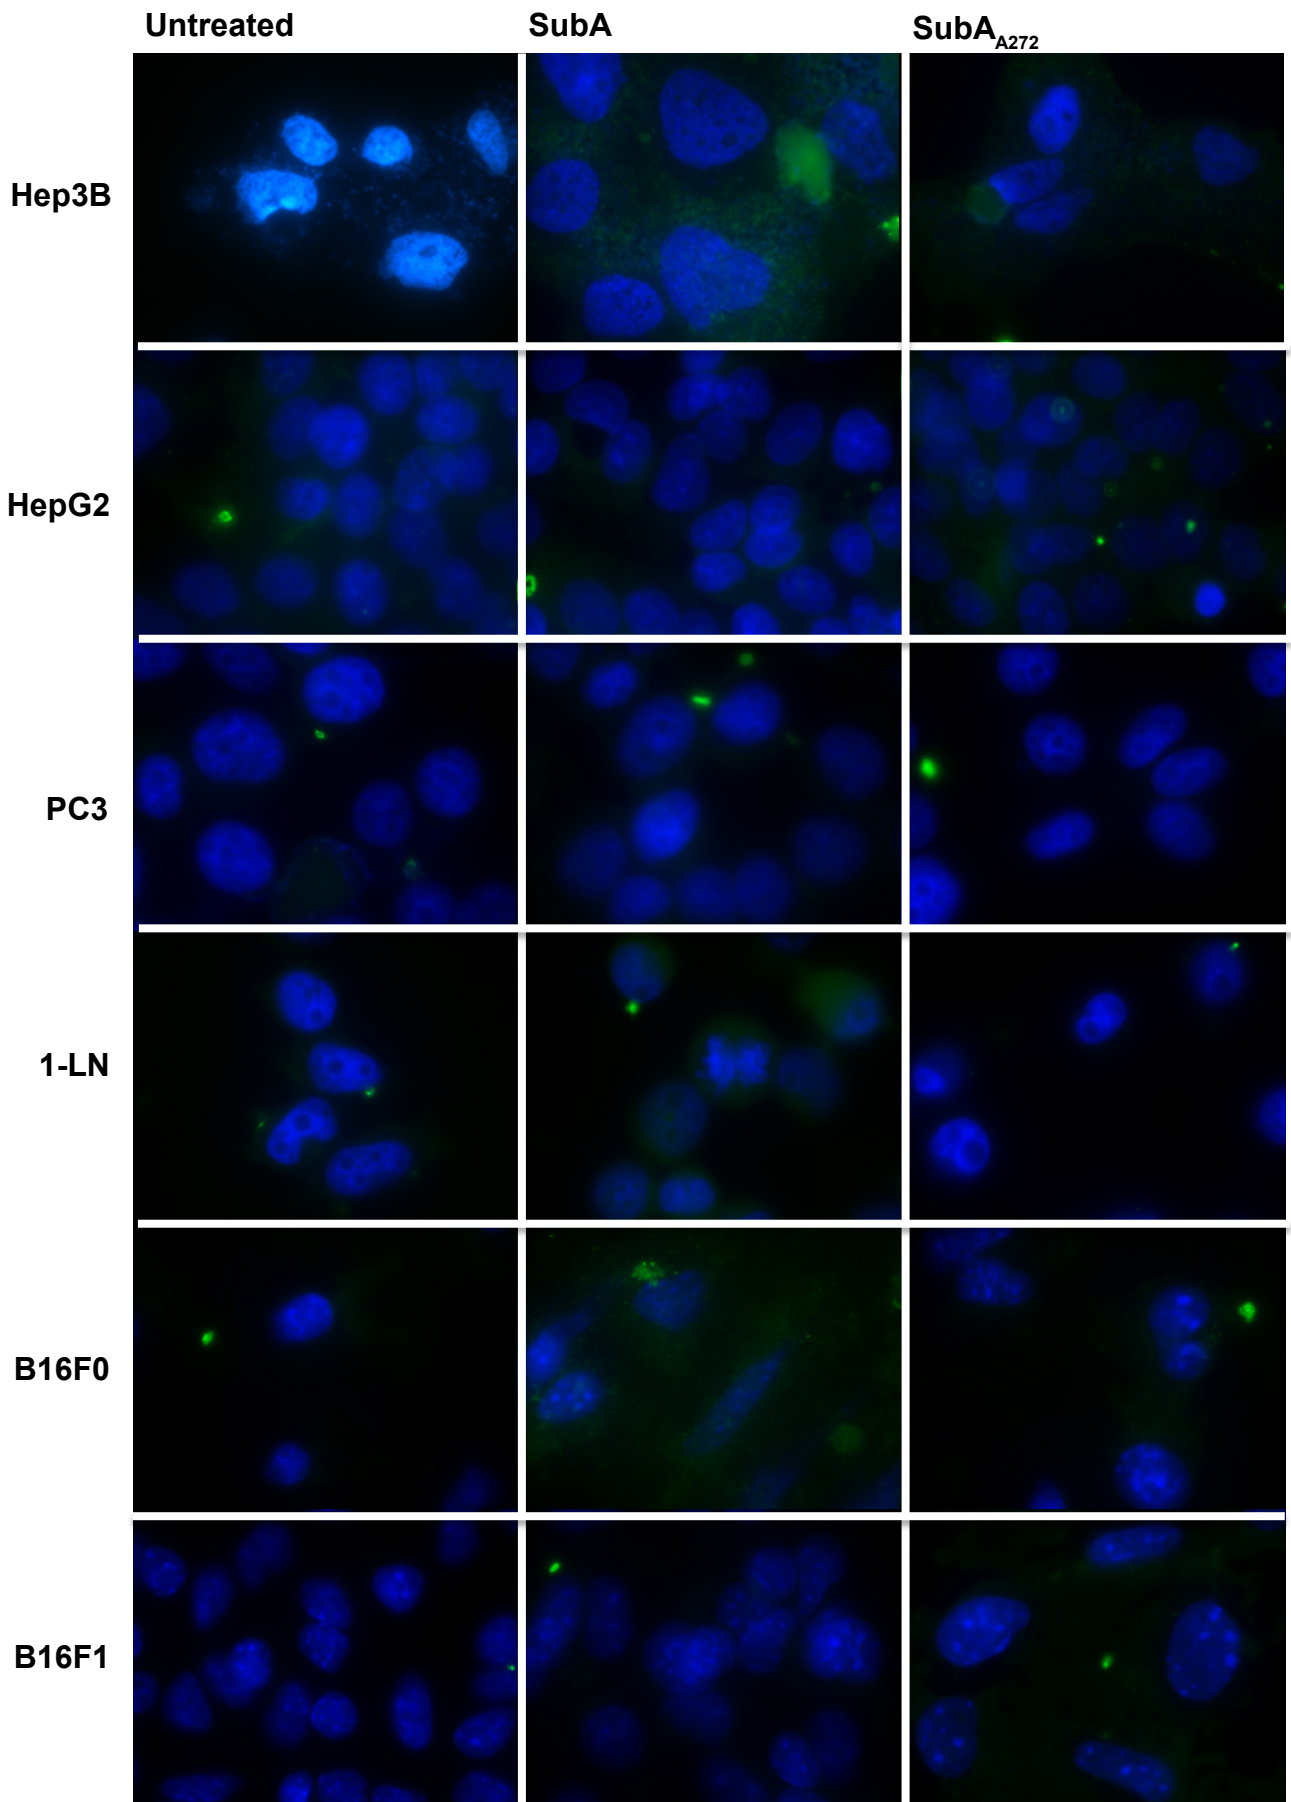

Supplement: supp_M112.399808_jbc.M112.399808-1.pdf [file supp_M112.399808_jbc.M112.399808-1.pdf]
